# Supplementary material for: A novel GLI3 mutation affecting the zinc finger domain leads to preaxial-postaxial polydactyly-syndactyly complex
Source: PubMed Central journal article supplement (PMC4256830; doi:10.1186/s12881-014-0110-9), 2014-09-30
Supplement: 12881_2014_110_MOESM1_ESM.pdf [file 12881_2014_110_MOESM1_ESM.pdf]

## Clinical Data

| Pt.      | Gender | Affected | Age (year) | OFC (cm) | % for age* | IPD (mm) | % for age* | Syndactyly**                 | Polydactyly**                        |
|----------|--------|----------|------------|----------|------------|----------|------------|------------------------------|--------------------------------------|
| I:1      | F      | +        |            |          |            |          |            | Simple, Incomplete Hand+foot | Postaxial, type B<br>Preaxial type 4 |
| II:1     | F      | +        |            |          |            |          |            | Simple, Incomplete Hand+foot | Preaxial type 4                      |
| II:2     | F      | +        | 53         | 56.3     | 75         | 6.6      | 97         | Simple, Incomplete Hand+foot | Postaxial, type B<br>Preaxial type 4 |
| II:3     | F      | +        |            |          |            |          |            | Simple, complete, Foot       | Preaxial type 4                      |
| III:1    | M      | +        |            |          |            |          |            | Simple, Incomplete Hand+foot | Preaxial type 4                      |
| III:2    | F      | +        |            |          |            |          |            | Simple, Incomplete Hand+foot | Preaxial type 4                      |
| III:3    | F      | —        | 30         | 56.4     | 78         | 6.5      | 97         | —                            | —                                    |
| III:4    | M      | +        | 31         | 59       | 91         | 6.8      | 97         | Simple, Incomplete Hand+foot | Postaxial, type B<br>Preaxial type 4 |
| III:5*** | F      | +        | 30         | 56.2     | 40         | 6.8      | 97         | Simple, Incomplete Hand+foot | Postaxial, type B<br>Preaxial type 4 |
| III:6    | M      | —        | 22         | 56.4     | 50         | 6.7      | 95         | —                            | —                                    |
| III:7    | F      | —        | 19         | 51.8     | 5          | 5        | 3          | —                            | —                                    |
| III:8    | F      | —        | 17         | 54.6     | 40         | 6.3      | 95         | —                            | —                                    |
| III:9    | M      | +        | 6          | 50.7     | 50         | 5.4      | 75         | Simple, complete, Foot       | Preaxial type 4                      |
| III:10   | M      | +        | 11         | 57.6     | 95         | 6.1      | 80         | Simple, complete, Foot       | Preaxial type 4                      |
| III:11   | M      | +        | 2          | 53.1     | 95         | 5.3      | 85         | Simple, Incomplete Hand+foot | Postaxial, type B<br>Preaxial type 4 |
| III:12   | M      | +        |            |          |            |          |            | Simple, complete, Foot       | Preaxial type 4                      |
| III:13   | M      | +        | 22         | 58.9     | 90         | 6.6      | 97         | Simple, Incomplete Hand+foot | Postaxial, type B<br>Preaxial type 4 |
| III:14   | F      | —        | 25         | 57.6     | 75         | 6.5      | 97         | —                            | —                                    |
| IV:1     | M      | +        | 4          | 52.4     | 90         | 5.8      | 97         | Simple, Incomplete Hand+foot | Postaxial, type A<br>Preaxial type 4 |

OFC – occipitofrontal head circumference.

IPD – Interpupillary distance.

M – male, F – female.

\*Percentage was calculation by Growth references from 'Growth References Third Trimester to Adulthood' published by Greenwood Genetic Center 1998.

\*\* All cases are bilateral.

\*\*\* Mild mental retardation.
